# Supplementary material for: Proteomic profiling reveals insights into Triticeae stigma development and function
Source: PubMed Central journal article supplement (PMC4203142; doi:10.1093/jxb/eru350), 2014-08-28
Supplement: supp_eru350_jexbot130526_file002.pdf [file supp_eru350_jexbot130526_file002.pdf]

# Proteomic profiling reveals insights into Triticeae stigma development and function

*Nazila Nazemof, Philippe Couroux, Christof Rampitsch, Tim Xing, and Laurian S Robert*

## Supplementary Data

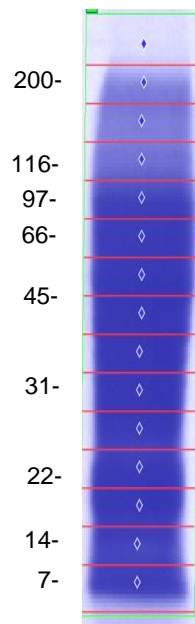

**Figure S1.** 1D SDS-PAGE of triticale mature stigma proteins indicating bands excised for 1D LC-MS/MS analysis.

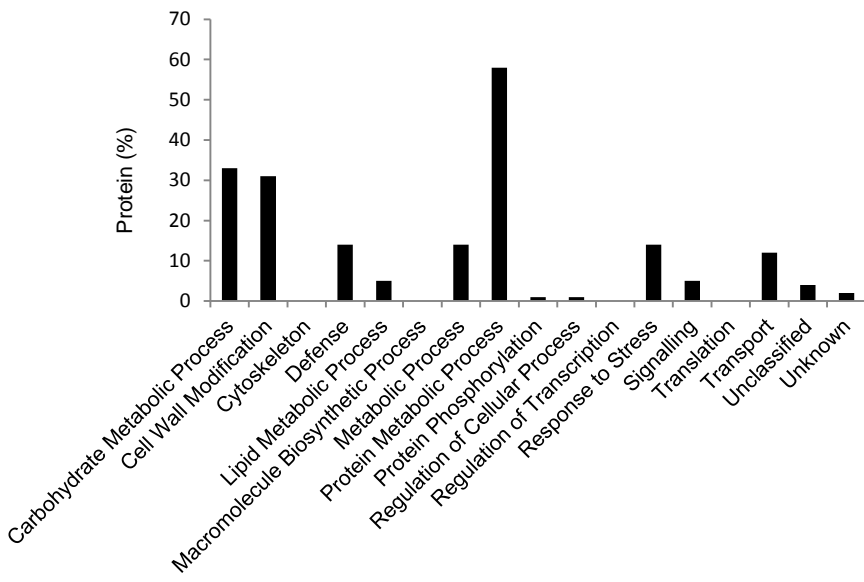

**Figure S2.** Functional distribution of triticale mature stigma proteins with a predicted signal peptide.
